# Supplementary material for: Evaluation of a Mobile Telesimulation Unit to Train Rural and Remote Practitioners on High-Acuity Low-Occurrence Procedures: Pilot Randomized Controlled Trial
Source: PubMed Central journal article supplement (PMC6701160; doi:10.2196/14587), 2019-08-06

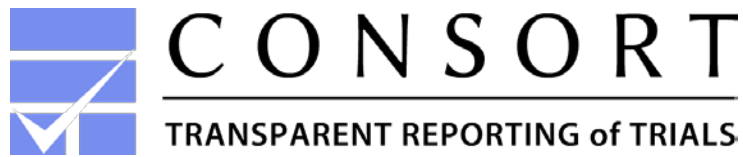

### CONSORT 2010 Flow Diagram

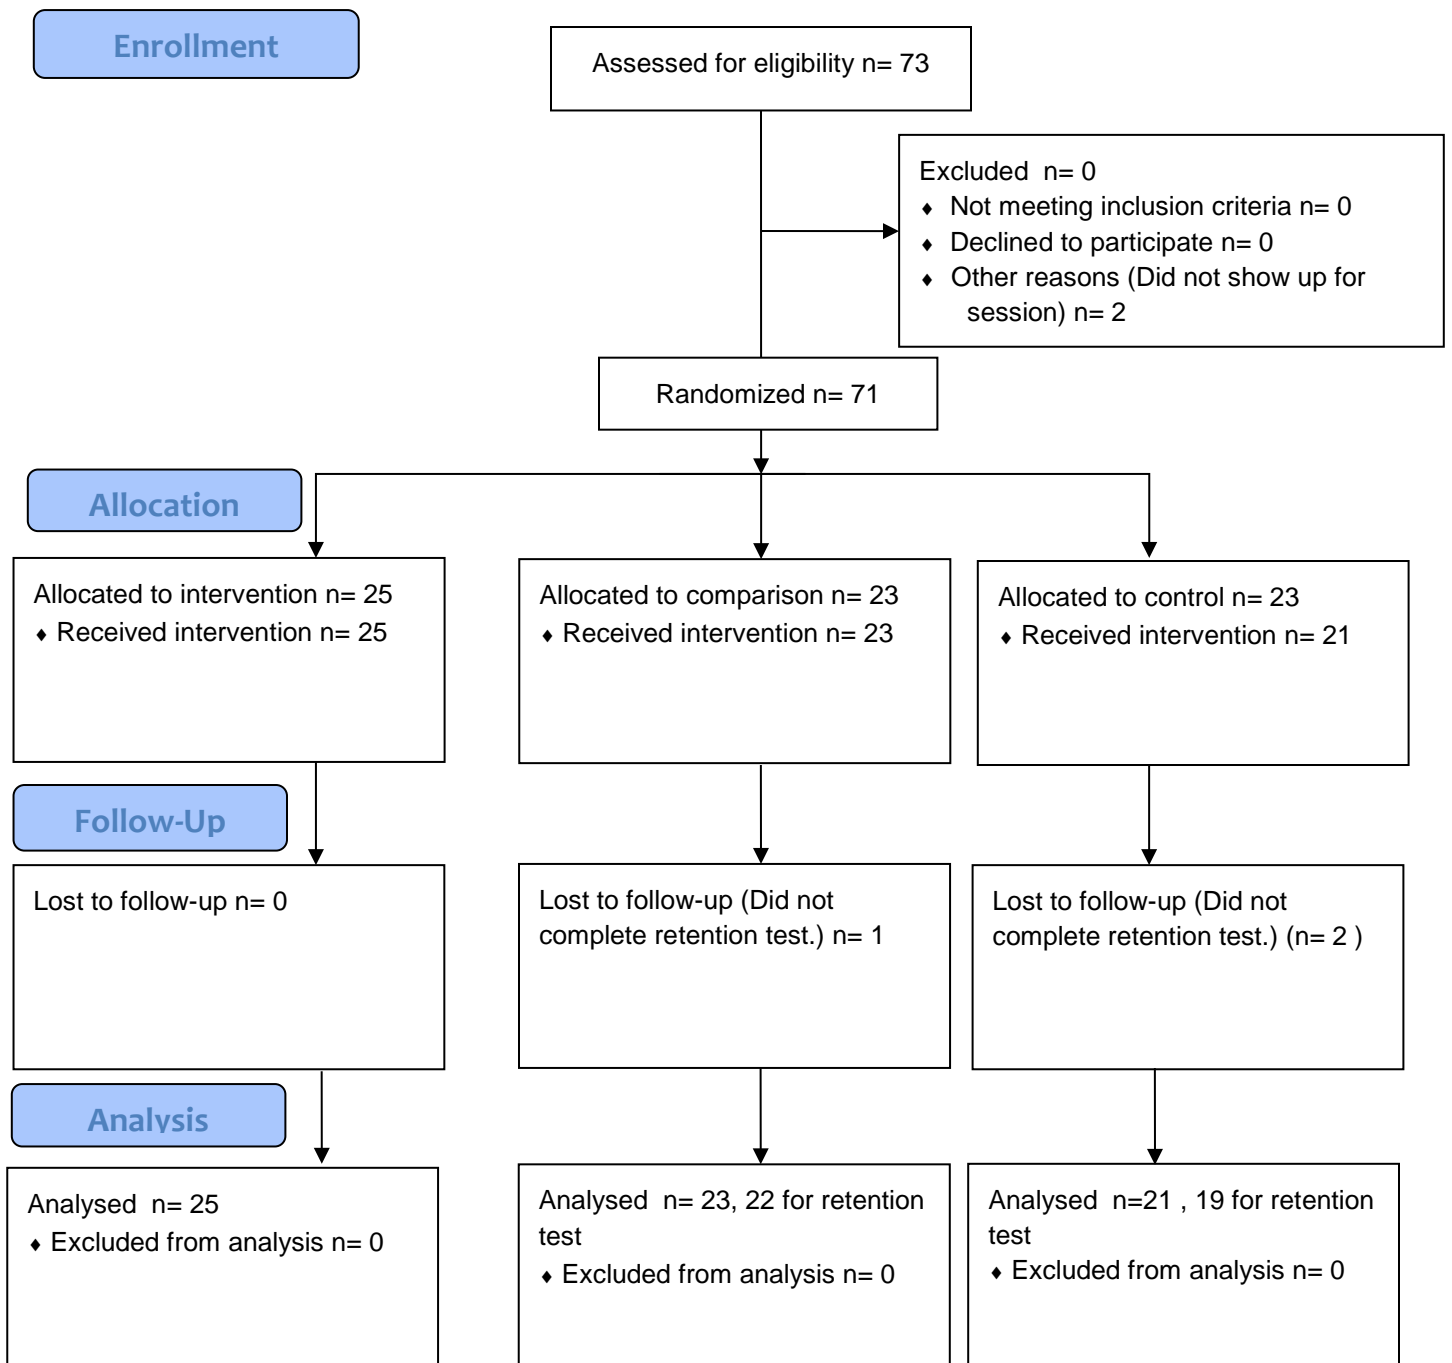

Supplement: jmir_v21i8e14587_app1.pdf [file jmir_v21i8e14587_app1.pdf]
