# Supplementary material for: Evaluation of a Mobile Telesimulation Unit to Train Rural and Remote Practitioners on High-Acuity Low-Occurrence Procedures: Pilot Randomized Controlled Trial
Source: PubMed Central journal article supplement (PMC6701160; doi:10.2196/14587), 2019-08-06
Supplement: jmir_v21i8e14587_app2.pdf [file jmir_v21i8e14587_app2.pdf]

## Multimedia Appendix

This is a Multimedia Appendix to a full manuscript published in the J Med Internet Res. For full copyright and citation information see <http://dx.doi.org/10.2196/jmir.14587>

### Differences between pre, post and retention procedural skills knowledge tests (written)

|                                 | $\chi^2(2)$ | <i>P value</i> | Mean Rank for Groups |            |         |
|---------------------------------|-------------|----------------|----------------------|------------|---------|
|                                 |             |                | Intervention         | Comparison | Control |
| Post minus pre-test score       | 4.15        | .13            | -0.50                | 0.58       | 0.67    |
| Retention minus post test score | 1.55        | .46            | -2.08                | -0.92      | -0.83   |
