# Supplementary material for: Evaluation of a Mobile Telesimulation Unit to Train Rural and Remote Practitioners on High-Acuity Low-Occurrence Procedures: Pilot Randomized Controlled Trial
Source: PubMed Central journal article supplement (PMC6701160; doi:10.2196/14587), 2019-08-06
Supplement: jmir_v21i8e14587_app3.pdf [file jmir_v21i8e14587_app3.pdf]

## Multimedia Appendix

This is a Multimedia Appendix to a full manuscript published in the J Med Internet Res. For full copyright and citation information see <http://dx.doi.org/10.2196/jmir.14587>

### Modified OSATS Checklist and GRS assessment of chest tube performance, average (SD) reported.

|                                                                                                                                        | <b>Intervention group (n=25)</b> | <b>Comparison group (n=23)</b> | <b>Control group (n=21)</b> |
|----------------------------------------------------------------------------------------------------------------------------------------|----------------------------------|--------------------------------|-----------------------------|
| Checklist score (maximum= 9)                                                                                                           |                                  |                                |                             |
| Pre-test                                                                                                                               | 3.00 (1.80)                      | 2.96 (1.64)                    | 2.91 (2.02)                 |
| Post-test                                                                                                                              | 6.56 (1.39)                      | 6.22 (1.24)                    | 3.62 (2.29)                 |
| Retention test                                                                                                                         | 6.16 (1.37)                      | 5.48 (1.92)                    | 3.24 (2.05)                 |
| GRS score (maximum= 35)                                                                                                                |                                  |                                |                             |
| Pre-test                                                                                                                               | 10.80 (4.50)                     | 10.52 (5.51)                   | 11.14 (4.49)                |
| Post-test                                                                                                                              | 21.48 (6.95)                     | 21.00 (6.30)                   | 13.38 (7.21)                |
| Retention test                                                                                                                         | 21.56 (7.43)                     | 18.39 (8.09)                   | 12.14 (5.89)                |
| Checklist was based on 9 questions that were scored as either 0 (incorrect) or 1 (correct), for a possible total of 9 points.          |                                  |                                |                             |
| GRS was based on 7 questions with scores on a scale from 1 (worst) to 5 (best), the total was added for a possible total of 35 points. |                                  |                                |                             |
