# Supplementary material for: Evaluation of a Mobile Telesimulation Unit to Train Rural and Remote Practitioners on High-Acuity Low-Occurrence Procedures: Pilot Randomized Controlled Trial
Source: PubMed Central journal article supplement (PMC6701160; doi:10.2196/14587), 2019-08-06
Supplement: jmir_v21i8e14587_app4.pdf [file jmir_v21i8e14587_app4.pdf]

## Multimedia Appendix

This is a Multimedia Appendix to a full manuscript published in the J Med Internet Res. For full copyright and citation information see <http://dx.doi.org/10.2196/jmir.14587>

### Differences between pre, post and retention modified OSATS checklist and GRS test scores.

|                                 | $\chi^2(2)$ | <i>P</i> value | Mean Rank for Groups |             |         | Pairwise Comparisons                                                                           |
|---------------------------------|-------------|----------------|----------------------|-------------|---------|------------------------------------------------------------------------------------------------|
|                                 |             |                | Inter-vention        | Compar-ison | Control |                                                                                                |
| <b>Checklist</b>                |             |                |                      |             |         |                                                                                                |
| Post minus pre-test score       | 24.26       | <.001          | 4.00                 | 3.00        | 1.00    | Control-Comparison, P<.001<br>Control-Intervention, P<.001<br>Comparison-Intervention, P=1.00  |
| Retention minus post test score | 0.57        | .75            | -1.00                | -1.00       | -1.00   | n/a                                                                                            |
| <b>GRS</b>                      |             |                |                      |             |         |                                                                                                |
| Post minus pre-test score       | 16.01       | <.001          | 13.00                | 12.00       | 8.00    | Control-Comparison, P= .02<br>Control-Intervention, P= .01<br>Comparison-Intervention, P= 1.00 |
| Retention minus post-test score | 0.67        | .72            | 0.00                 | -1.00       | -1.00   | n/a                                                                                            |
